# Supplementary material for: Association between Social Interactions and Motor Function in Community Dwelling Older Japanese Adults
Source: Research Square preprint supplement (doi:10.21203/rs.3.rs-8605444/v1), 2026-02-17
Supplement: Supplementary file 1 [file bfbddb24bf5c195d9c864a23.docx]

**Tables**

**Table 1. Demographic information at baseline (N=304)**

| Variable | n | % |
| --- | --- | --- |
| ISI, Mean±SD | 16.31±1.81 | |
| Independence, Mean±SD | 3.93±0.35 | |
| Social curiosity, Mean±SD | 4.13±1.10 | |
| Interaction, Mean±SD | 2.88±0.43 | |
| Feeling of safety, Mean±SD | 1.86±0.43 | |
| Participation, Mean±SD | 3.52±0.62 | |
| Age, years, Mean±SD | 71.20±5.14 | |
| Sex |  |  |
| Male | 133 | 43.8 |
| Female | 171 | 56.2 |
| Exercise habit |  |  |
| Yes | 203 | 66.8 |
| No | 101 | 33.2 |
| Disease condition |  |  |
| Yes | 272 | 89.5 |
| No | 32 | 10.5 |
| Smoking |  |  |
| Yes | 31 | 66.8 |
| No | 273 | 33.2 |
| Drinking |  |  |
| Yes | 107 | 35.2 |
| No | 197 | 64.8 |
| Motor function |  |  |
| Normal | 265 | 87.2 |
| Low | 39 | 12.8 |

Note. ISI, Index of Social Interaction; SD, standard deviation. Adjusted for age, sex, disease condition, smoking, exercise habits, and alcohol consumption.

**Table 2. Chi-squared test results for the association between covariates and motor function (N=304)**

| Variable | Category | |  | Motor function | | | | | | P-value | |
| --- | --- | --- | --- | --- | --- | --- | --- | --- | --- | --- | --- |
| Normal(n,%) | | | |  | Low(n,%) | |
| Sex | Male | 121 | | | 90.1 | 12 | | | 9.9 | 0.080 |
|  | Female | 144 | | | 84.3 | 27 | | | 18.8 |  |
| Exercise habit | Yes | 177 | | | 87.2 | 26 | | | 12.8 | 0.988 |
|  | No | 88 | | | 87.1 | 13 | | | 12.9 |  |
| Disease condition | Yes | 235 | | | 86.4 | 37 | | | 13.6 | 0.239 |
|  | No | 30 | | | 93.8 | 2 | | | 6.3 |  |
| Drinking | Yes | 98 | | | 90.8 | 10 | | | 9.2 | 0.167 |
|  | No | 167 | | | 85.2 | 29 | | | 14.8 |  |
| Smoking | Yes | 27 | | | 87.1 | 4 | | | 12.9 | 0.990 |
|  | No | 238 | | | 87.2 | 12 | | | 12.8 |  |

Note. ISI, Index of Social Interaction.

**Table 3. Mann–Whitney U tests results for the association between ISI, five ISI subscales, age, and motor function (N=304)**

| Variable |  | Motor function | | | | | P-value | |
| --- | --- | --- | --- | --- | --- | --- | --- | --- |
| Normal(n,%) | | |  | | Low(n,%) |
| ISI | 16.31±1.81 | |  | | 16.30±1.84 | | | 0.013 | |
| Age | 71.20±5.14 | |  | | 71.30±5.14 | | | <0.001 | |
| Independence | 3.93±0.35 | |  | | 3.92±0.35 | | | 0.158 | |
| Social curiosiry | | 4.13±1.10 | |  | | 4.12±1.10 | | | 0.015 | |
| Interaction | 2.88±0.43 | |  | | 2.87±0.44 | | | 0.782 | |
| Feeling of safety | 1.86±0.43 | |  | | 1.85±0.44 | | | 0.128 | |
| Participation | 3.52±0.62 | |  | | 3.50±0.62 | | | 0.130 | |

Note. ISI, Index of Social Interaction.

**Table 4. Bivariate correlations between the covariates and ISI (N=304)**

| Variables | | 1 | | 2 | | 3 | | 4 | | 5 | | 6 | | 7 | |
| --- | --- | --- | --- | --- | --- | --- | --- | --- | --- | --- | --- | --- | --- | --- | --- |
| Age | | - | |  | |  | |  | |  | |  | |  | |
| Sex | -.01 | | - | |  | |  | |  | |  | |  | |
| Exercise habit | .01 | | -.01 | | - | |  | |  | |  | |  | |
| Drinking | -.06 | | .53** | | .12* | | - | |  | |  | |  | |
| Smoking | -.10 | | .18** | | .02 | | .11* | | - | |  | |  | |
| Disease condition | -.12* | | .06 | | .04 | | .04 | | .13* | | - | |  | |
| ISI | -0.1 | | .07 | | .32** | | .08 | | .01* | | .04 | | - | |

Note. ISI, Index of Social Interaction.

*P<0.05.**P< 0.01.

**Table 5. Bivariate correlations between covariates and the five subscales of the ISI (N=304)**

| Variables | | 1 | | 2 | | 3 | | 4 | | 5 | | 6 | | 7 | | 8 | | 9 | | 10 | | 11 | |
| --- | --- | --- | --- | --- | --- | --- | --- | --- | --- | --- | --- | --- | --- | --- | --- | --- | --- | --- | --- | --- | --- | --- | --- |
| Age | | - | |  | |  | |  | |  | |  | |  | |  | |  | |  | |  | |
| Sex | -.01 | | - | |  | |  | |  | |  | |  | |  | |  | |  | |  | |
| Exercise habit | .01 | | -.01 | | - | |  | |  | |  | |  | |  | |  | |  | |  | |
| Drinking | -.06 | | .53** | | .12* | | - | |  | |  | |  | |  | |  | |  | |  | |
| Smoking | -.10 | | .18** | | .02 | | .11* | | - | |  | |  | |  | |  | |  | |  | |
| Disease condition | -.12* | | .06 | | .04 | | .04 | | .13* | | - | |  | |  | |  | |  | |  | |
| Independence | -.12* | | .13* | | .10 | | -.06 | | -.01 | | -.01 | | - | |  | |  | |  | |  | |
| Social curiosity | .07 | | -.09 | | .28** | | .11 | | .01 | | .03 | | .15** | | - | |  | |  | |  | |
| Interaction | -.01 | | -.03 | | .04 | | -.03 | | .07 | | .11 | | .07 | | .11* | | - | |  | |  | |
| Participation | .02 | | .03 | | .24** | | -.05 | | -0.1 | | .02 | | .08 | | .30** | | .08 | | - | |  | |
| Feeling of safety | -.05 | | .03 | | .09 | | .03 | | .01 | | .01 | | .11 | | .14* | | .15** | | .22** | | - | |
| Note. ISI, Index of Social Interaction.  *P<0.05.**P< 0.01. | | | | | | | | | | | | | | | | | | | |  | |  | |

**Table 6. Analysis of ISI, covariates, and VIF for motor function (N=304)**

| Variables | | VIF | |
| --- | --- | --- | --- |
| Age | | 1.0 | |
| Sex | 1.0 | |
| Exercise habit | 1.5 | |
| Drinking | 1.1 | |
| Smoking | 1.0 | |
| Disease condition | 1.4 | |
| ISI | 1.1 | |

Note. ISI, Index of Social Interaction; VIF, variance inflation factor.

**Table 7. Analysis of the association between ISI Social curiosity, covariates, and VIF for motor function (N=304)**

| Variables | | VIF | |
| --- | --- | --- | --- |
| Age | | 1.0 | |
| Sex | 1.4 | |
| Exercise habit | 1.1 | |
| Drinking | 1.4 | |
| Smoking | 1.1 | |
| Disease condition | 1.0 | |
| Social curiosity | 1.1 | |

Note. ISI, Index of Social Interaction; VIF, variance inflation factor.

**Table 8.** **Unadjusted logistic regression analysis of ISI and motor function maintenance (N=304)**

| Variable | OR | 95%CI | P-value |
| --- | --- | --- | --- |
| ISI | 1.25 | 1.06-1.47 | 0.01 |

Note. ISI, Index of Social Interaction; OR, odds ratio; CI, confidence interval.

**Table 9. Unadjusted logistic regression analysis of social curiosity and motor function maintenance (N=304)**

| Variable | OR | 95%CI | P-value |
| --- | --- | --- | --- |
| Social curiosity | 1.45 | 1.11-1.90 | 0.01 |

Note. OR, odds ratio; CI, confidence interval.

**Table 10. Logistic regression analysis adjusted for significant covariates on motor function maintenance (N=304)**

| Variable | OR | 95%CI | P-value |
| --- | --- | --- | --- |
| ISI | 1.27 | 1.11-1.90 | 0.01 |
| Age | 0.80 | 0.74-0.86 | <0.01 |

Note. ISI, Index of Social Interaction; OR, odds ratio; CI, confidence interval.

**Table 11. Logistic regression analysis adjusted for significant covariates on motor function maintenance (N=304)**

| Variable | OR | 95%CI | *P* |
| --- | --- | --- | --- |
| Social curiosity | 1.48 | 1.09-2.01 | 0.01 |
| Age | 0.80 | 0.74-0.86 | <0.01 |

Note. OR, odds ratio; CI, confidence interval.

**Table 12. Fully-adjusted logistic regression analysis of ISI and motor function (N=304)**

| Variable | OR | 95%CI | P-value |
| --- | --- | --- | --- |
| ISI | 1.26 | 1.04-1.53 | 0.02 |
| Age | 0.80 | 0.74-0.86 | <0.01 |
| Sex | 0.52 | 0.20-1.38 | 0.20 |
| Exercise habit | 0.84 | 0.35-2.00 | 0.70 |
| Disease condition | 1.73 | 0.31-9.43 | 0.53 |
| Drinking | 1.30 | 0.47-3.39 | 0.64 |
| Smoking | 0.76 | 0.20-2.89 | 0.69 |

Note. ISI, Index of Social Interaction; OR, odds ratio; CI, confidence interval.

**Table 13.** **Fully-adjusted logistic regression analysis of social curiosity and motor function (N=304)**

| Variable | OR | 95%CI | P-value |
| --- | --- | --- | --- |
| Social curiosity | 1.45 | 1.04-2.01 | 0.03 |
| Age | 0.80 | 0.74-0.86 | <0.01 |
| Sex | 0.52 | 0.20-1.30 | 0.20 |
| Exercise habit | 0.84 | 0.36-2.00 | 0.71 |
| Disease condition | 1.73 | 0.31-9.43 | 0.53 |
| Drinking | 1.30 | 0.42-3.15 | 0.78 |
| Smoking | 0.70 | 0.20-2.82 | 0.63 |

Note. OR, odds ratio; CI, confidence interval.

# Appendix

**Appendix 1. Index of Social Interaction (ISI)**

| Items | | Questions | Options |
| --- | --- | --- | --- |
| **1. Independence** | |  |  |
| Motivation to live (own way) | “Do you have motivation to live an active lifestyle?” | | (1) Always (2) frequently (3) occasionally (4) infrequently |
| Taking an active approach | “Do you take an active approach toward your life?” | | (1) Always (2) frequently (3) occasionally (4) infrequently |
| Being inspired to lead a healthy lifestyle | “Are you motivated to live a healthy life?” | | (1) Always (2) frequently (3) occasionally (4) infrequently |
| Maintaining a routine way of life | “Do you have a regular or routine lifestyle?” | | (1) Always (2) frequently (3) occasionally (4) infrequently |
| **2. Social curiosity** |  | |  |
| Reading newspapers | “Are you a newspaper reader?” | | (1) Daily (2) Twice Weekly (3) Once Weekly (4) Seldom (4) rare |
| Reading books | “Do you read books or magazines regularly?” | | (1) Daily (2) Twice Weekly (3) Once Weekly (4) Seldom (4) rare |
| Try to use new equipment | “Do you try to use new equipment?” | | (1) Always (2) frequently (3) occasionally (4) infrequently |
| Having a hobby | “Do you have any hobby?” | | (1) Always (2) frequently (3) occasionally (4) infrequently |
| Feeling of importance | “Do you have feeling of importance in the society?” | | 1. Always (2) frequently (3) occasionally   (4) infrequently |

| Items | Questions | Options |
| --- | --- | --- |
| **3. Interaction** |  |  |
| Family communication | “Do you often communicate with your family members?” | (1) Daily (2) Twice Weekly (3) Once Weekly (4) Seldom |
| Interaction with non-family members | “Do you communicate with nonfamily persons regularly?” | (1) Daily (2) Twice Weekly (3) Once Weekly (4) Seldom |
| Interaction with nonfamily  persons | “Do you interact with nonfamily persons regularly?” | (1) Daily (2) Twice Weekly (3) Once Weekly (4) Seldom |
| **4. Participation in society** |  |  |
| Engagement with social groups | “Do you have the chance to participate in social groups?” | (1) Daily (2) Twice Weekly (3) Once Weekly (4) Seldom |
| Watching television | “Do you watch television?” | (1) Daily (2) Twice Weekly (3) Once Weekly (4) Seldom |
| Involvement in community events and the frequency of friendships | “Do you have the chance to participate in your neighborhood affairs?”  “How often do you make friends?” | (1) Always  (2) frequently  (3) occasionally  (4) infrequently |
| Having an active role in society | “Do you have an active role in society or social affairs?” | (1) Always  (2) frequently  (3) occasionally  (4) infrequently |
| **5. Feeling of safety** |  |  |
| Having counsel | “Do you have someone to counsel with in difﬁcult situation?” | (1) Always  (2) frequently  (3) occasionally  (4) infrequently |
| Having someone to give support in emergency | “Do you have someone to support you in an emergency?” | (1) Always  (2) frequently  (3) occasionally  (4) infrequently |

**Appendix 2. Kihon checklist**

| Question | Answer | |
| --- | --- | --- |
| 1.Do you travel alone by train or bus? | 0.Yes | 1.No |
| 2. Do you go shopping alone to get everyday essentials? | 0.Yes | 1.No |
| 3.Do you oversee your own bank funds and deposits? | 0.Yes | 1.No |
| 4.Do you occasionally go to see your friends? | 0.Yes | 1.No |
| 5.Do your friends or family members ask you for advice? | 0.Yes | 1.No |
| 6.Do you typically ascend steps without the assistance of a wall or railing? | 0.Yes | 1.No |
| 7.Do you typically get out of a chair by yourself? | 0.Yes | 1.No |
| 8.Do you typically walk for 15 minutes straight? | 0.Yes | 1.No |
| 9.Have you fallen during the last 12 months? | 1.Yes | 0.No |
| 10.Are you afraid of falling when you're walking? | 1.Yes | 0.No |
| 11.In the last 6 months, have you dropped 2 kilograms or more? | 1.Yes | 0.No |
| 12.__ cm for height, ___ kg for weight, and ___ kg/m² for BMI  This item is used if the BMI is less than 18.5. | 1.Yes | 0.No |
| 13.Do you find it harder to eat difficult dishes now than you did 6 months ago? | 1.Yes | 0.No |
| 14.Have you ever choked on soup or tea? | 1.Yes | 0.No |
| 15.Do you frequently suffer from dry mouth? | 1.Yes | 0.No |
| 16.How many times a week do you go out? | 0.Yes | 1.No |
| 17.Do you go out less often than you did the previous year? | 1.Yes | 0.No |
| 18.Is your memory loss brought up by your family or friends? For example, "You ask the same question over and over again." | 1.Yes | 0.No |
| 19.Do you search up phone numbers before making a call? | 0.Yes | 1.No |
| 20.Do you often have trouble remembering the date of today? | 1.Yes | 0.No |
| 21.Have you experienced a lack of fulfillment in your day-to-day life throughout the past 2 weeks? | 1.Yes | 0.No |
| 22.Have you noticed a lack of enjoyment in the activities you used to like throughout the past 2 weeks? | 1.Yes | 0.No |
| 23.Have you had trouble doing something you used to be able to accomplish with ease in the past 2 weeks? 24.Have you felt powerless in the past 2 weeks? 25. Have you experienced unjustified fatigue in the past 2 weeks? | 1.Yes  1.Yes  1.Yes | 0.No  0.No  0.No |
